# Supplementary material for: ASAP-SML: An antibody sequence analysis pipeline using statistical testing and machine learning
Source: PLoS Comput Biol. 2020 Apr 27;16(4):e1007779. doi: 10.1371/journal.pcbi.1007779 (PMC7205315; doi:10.1371/journal.pcbi.1007779)
Supplement: S4 Table — (XLSX) [file pcbi.1007779.s007.xlsx]

## Sheet: SalientFeatureComparison
ASAP-SML: An Antibody Sequence Analysis Pipeline Using Statistical Testing and Machine Learning
Xinmeng Li, James A. Van Deventer and Soha Hassoun
Tufts University, Medford, MA, United States of America
S4 Table
Significant heavy chain features in Fisher Exact Test (Commonn features between the comparison is in red) (Common features identified using the Fisher Exact Test and feature section are highlighted in yellow) Number of common features: 7					Important heavy chain features in feature selection (Commonn features between the comparison is in red) (Common features identified using the Fisher Exact Test and feature section are highlighted in yellow) Number of common features: 12
MMP-targeting vs PDB-reference analysis		MMP-IGHV-targeting vs IGHV-reference analysis			MMP-targeting vs PDB-reference analysis		MMP-IGHV-targeting vs IGHV-reference analysis
Feature type	Feature value	Feature type	Feature value		Feature type	Feature value	Feature type	Feature value
Germ HV	IGHV3-23	Germ HJ	IGHJ3		Germ HV	IGHV3-23	Canonical H3	3
Canonical H2	6	Motif	4_YD		Canonical H2	6	Germ HJ	IGHJ3
Motif	6_YV	Motif	3_YY		Canonical H2	5	Germ HJ	IGHJ6
Motif	10_NG	Canonical H3	2		Germ HJ	IGHJ2	Motif	5_YY
Motif	9_YY	Motif	4_YDS		Motif	9_YY	PI	5.6875-6.125
Motif	6_YVG	Motif	3_YYD		Motif	7_VGW	PI	3.5-3.9375
Motif	7_VG	Motif	6_SSG		PI	3.5-3.9375	PI	0.0-3.5
Motif	7_VGW	Motif	7_SGY		Motif	8_GWN	Canonical H3	2
Motif	8_GW	Motif	2_YG		Canonical H2	0	Motif	2_YG
Motif	2_AY	Motif	5_DS		Germ HJ	IGHJ6	PI	3.9375-4.375
Motif	8_GWN	Motif	8_GY		Germ HV	IGHV3-33	Germ HJ	IGHJ4
Motif	9_WN	Motif	9_YY		Canonical H1	2	Motif	3_YY
Germ HJ	IGHJ6	PI	0.0-3.5		Canonical H1	1	Motif	9_FD
Canonical H1	1	Motif	9_YYY		PI	0.0-3.5	Motif	8_YY
PI	3.5-3.9375	Motif	5_YY		Motif	10_YY	Motif	4_YD
Motif	10_YY	Motif	6_SS		Motif	5_YY	Germ HJ	IGHJ5
Motif	4_GD	Motif	7_SG		Canonical H1	3	Motif	6_SG
Motif	4_YD				PI	3.9375-4.375	PI	4.8125-5.25
Motif	5_DY				Canonical H3	2	PI	7.0-14.0
PI	0.0-3.5				Motif	10_MD
Motif	8_MD				Motif	2_GG
Canonical H3	2				Germ HV	IGHV3-30
Motif	5_YY				Canonical H3	3
Motif	3_YG				Canonical H3	0
Motif	3_YY				Germ HV	IGHV1-69
Motif	8_YY				Germ HJ	IGHJ5
Motif	2_YG				Germ HJ	IGHJ4
Canonical H3	3				PI	7.0-14.0
					Germ HV	IGHV1-46
					Motif	6_YVG
					Motif	8_GW
					Motif	9_WN
					Germ HV	IGHV1-2
					Motif	2_AY
					Germ HV	IGHV2-9
					Canonical H1	4
					Motif	8_YY
					Canonical H3	1
					PI	6.125-7.0
					Motif	2_YG
